# Supplementary material for: Unit Costs in Health Economic Evaluations: Quo Vadis, Austria?
Source: MDPI journal article supplement (doi:10.3390/ijerph20010117), 2022-12-22
Supplement: s1 [file s1]

## Ovid MEDLINE(R)

- 1 (cost\* or economic\* or price\* or financ\*).ti,ab,kw.
- 2 (health\* or medic\*).ti,ab,kw.
- 3 1 and 2
- 4 (cost\* adj3 method').ti,ab,kw.
- 5 (economic adj3 evaluation\*).ti,ab,kw.
- 6 reimbursement.ti,ab,kw.
- 7 exp Cost-Benefit Analysis/
- 8 "cost-benefit analysis".ti,ab,kw.
- 9 exp "Cost of Illness"/
- 10 "cost of illness".ti,ab,kw.
- 11 (cost adj3 control).ti,ab,kw.
- 12 exp "Costs and Cost Analysis"/
- 13 "cost-effectiveness analysis".ti,ab,kw.
- 14 "cost-utility analysis".ti,ab,kw.
- 15 (cost\* adj3 estimate\*).ti,ab,kw.
- 16 (cost\* adj3 variable\*).ti,ab,kw.
- 17 exp "models, economic"/
- 18 3 or 4 or 5 or 6 or 7 or 8 or 9 or 10 or 11 or 12 or 13 or 15 or 16 or 17
- 19 exp Austria/
- 20 austria\*.ti,ab,kw.
- 21 (Graz or Innsbruck or Vienna or Wien or Salzburg or Linz or tirol or Tyrol or Styria or Carinthia or "Lower Austria" or "Upper Austria" or Vorarlberg or Burgenland).ti,ab,kw.
- 22 19 or 20 or 21
- 23 18 and 22
- 24 limit 23 to dt=20160101-20161231
